# Supplementary material for: Oxidative stress-induced MMP- and γ-secretase-dependent VE-cadherin processing is modulated by the proteasome and BMP9/10
Source: Springer Nature journal article supplement (doi:10.1038/s41598-022-27308-2), 2023-01-11
Supplement: MOESM1 [file 41598_2022_27308_MOESM1_ESM.pdf]

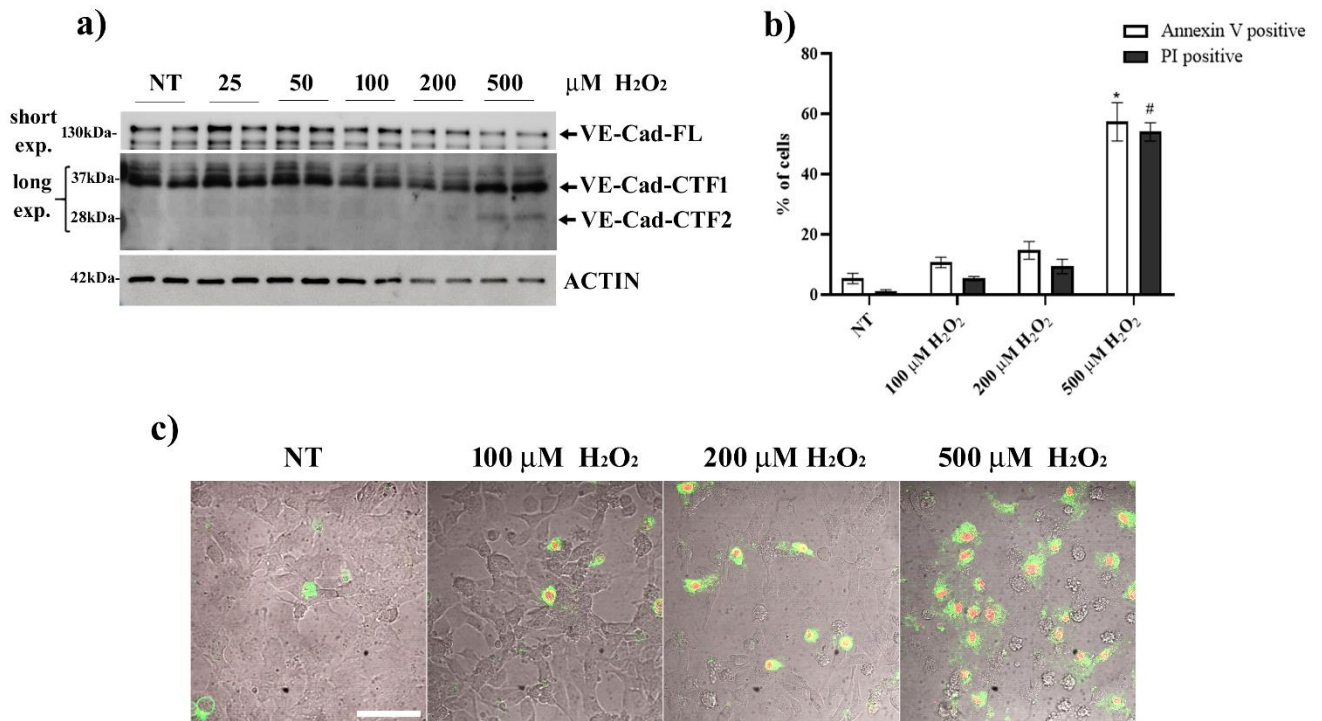

## Supplementary Fig.1

**Supplementary Fig.1: VE-Cad/CTF2 generation and apoptosis induction in HUVECs exposed to increasing concentration of  $\text{H}_2\text{O}_2$ .** a) WB analysis of VE-cadherin in HUVECs treated with increasing concentration of  $\text{H}_2\text{O}_2$ , as indicated. Actin was used as loading control. Results are representative of 2 independent experiments. b) Percentage of Annexin V FITC positive cells and propidium iodide (PI) positive cells was calculated counting 4 fields for each experimental condition in 3 independent experiments. Data are mean  $\pm$  s.e.m, \* $P < 0.001$  vs AnnexV FITC positive cells in NT, 100  $\mu\text{M}$  and 200  $\mu\text{M}$   $\text{H}_2\text{O}_2$ , #  $P < 0.001$  vs PI positive cells in NT, 100  $\mu\text{M}$  and 200  $\mu\text{M}$   $\text{H}_2\text{O}_2$ . c) Representative images of HUVECs exposed to increasing concentrations of  $\text{H}_2\text{O}_2$  and stained with annexin V-FITC/PI, as described in materials and methods. Scale bar=50  $\mu\text{m}$ .

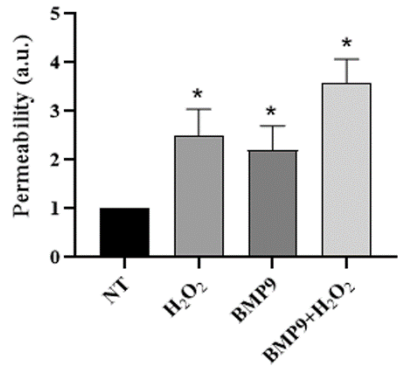

**Supplementary Fig.2**

**Supplementary Fig.2: BMP9 does not prevent oxidative stress-induced permeability.** The graph shows permeability of HUVECs pre-treated with BMP9 and exposed to 500  $\mu$ M H<sub>2</sub>O<sub>2</sub> for 6 hours. Data are mean  $\pm$  s.e.m. of 3 independent experiments. \*P<0.01 vs NT.

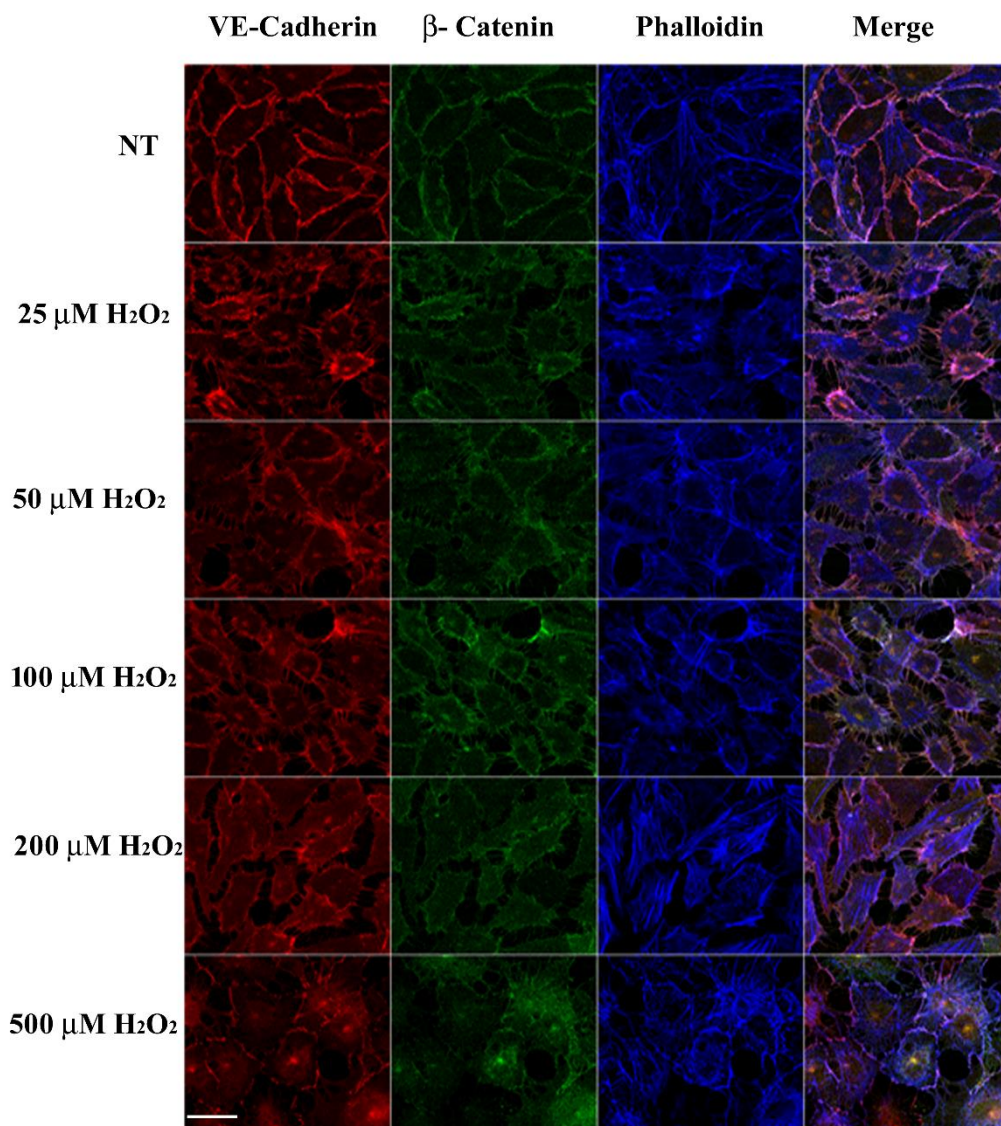

**Supplementary Fig.3**

**Supplementary Fig.3: VE-cadherin,  $\beta$ -catenin, and F-actin distribution in HUVECs exposed to increasing concentration of H<sub>2</sub>O<sub>2</sub>.** HUVECs were exposed to H<sub>2</sub>O<sub>2</sub> (25-500  $\mu$ M) for 6h. HUVECs were stained for VE-Cadherin (red),  $\beta$ -Catenin (green) using specific antibodies. Phalloidin was used to stain F-actin (blue). Scale bar=30  $\mu$ m.

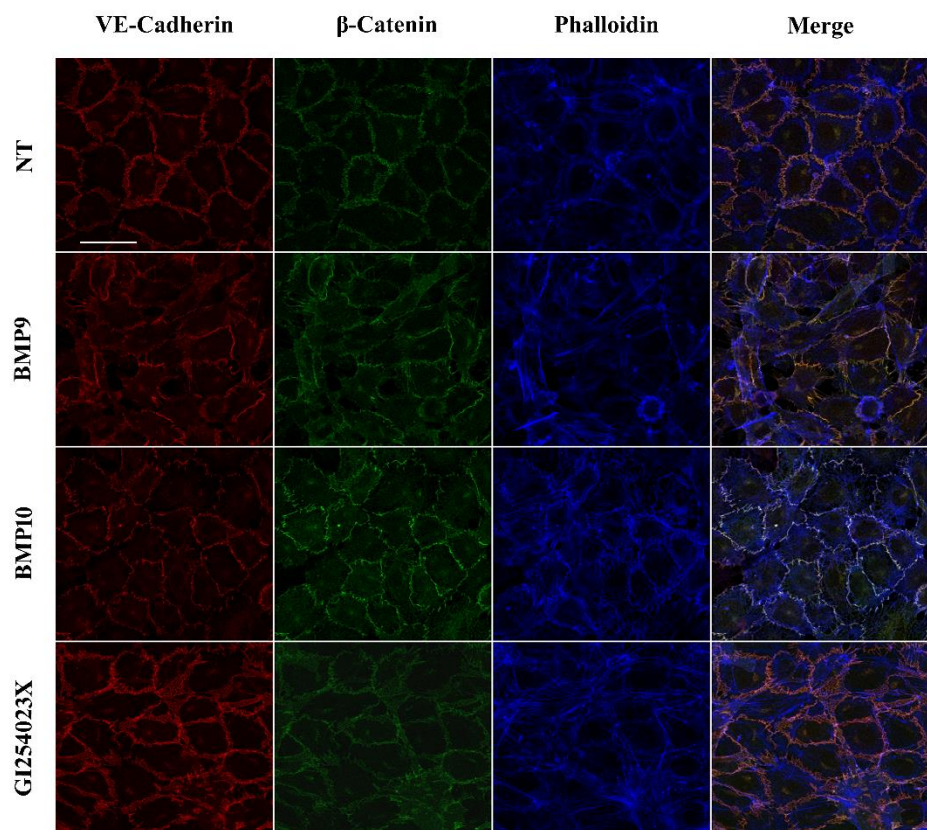

Supplementary Fig.4

**Supplementary Fig.4: VE-cadherin,  $\beta$ -catenin, and F-actin distribution in HUVECs exposed to BMP9/10 or MMPs inhibitor.** HUVECs were pre-treated with BMP9 (10 ng/ml), BMP10 (10 ng/ml) or GI254023X (10  $\mu$ M) for 24h. HUVECs were stained for VE-Cadherin (red),  $\beta$ -Catenin (green) using specific antibodies. Phalloidin was used to stain F-actin (blue). Scale bar=30  $\mu$ m. The panels are from the same representative experiment shown in Fig.4.

SHORTER EXPOSURE BLOTS USED FOR  
FULL LENGTH

E-Cad/FL

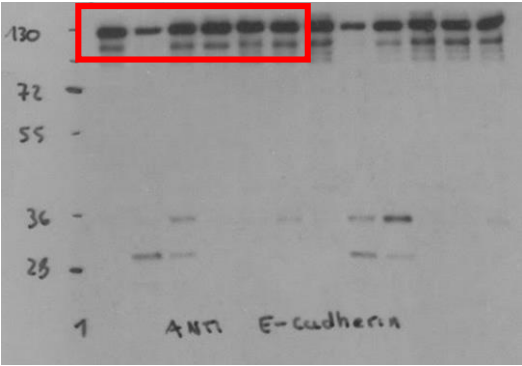

VE-Cad/FL

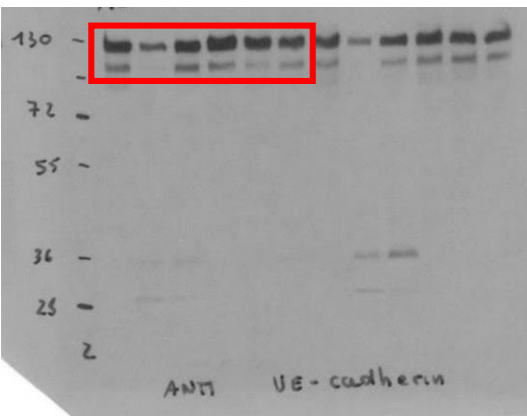

LONGER EXPOSURES USED FOR CTF1 and CTF2

E-Cad/CTF1 and  
E-Cad/CTF2

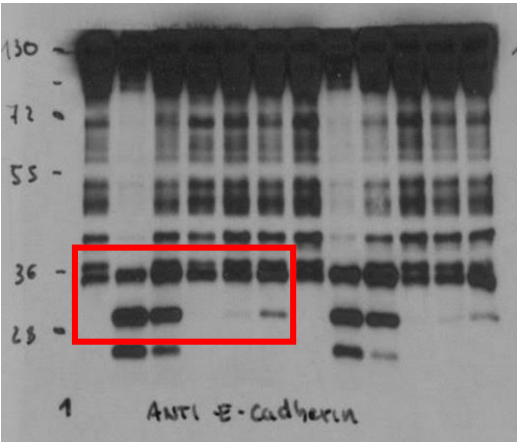

VE-Cad/CTF1 and  
VE-Cad/CTF2

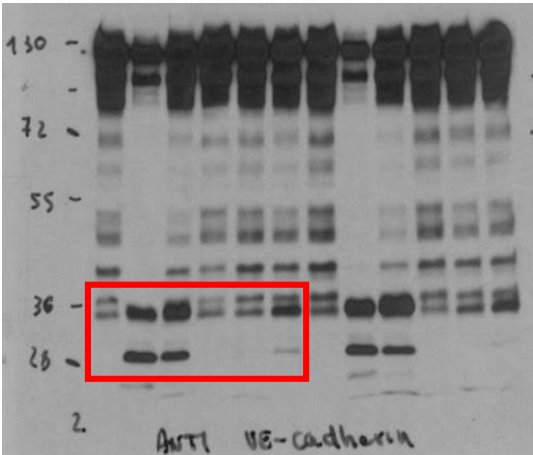

Fig.1



SHORTER EXPOSURE BLOTS USED FOR  
VE-cadherin FULL LENGTH, and ACTIN

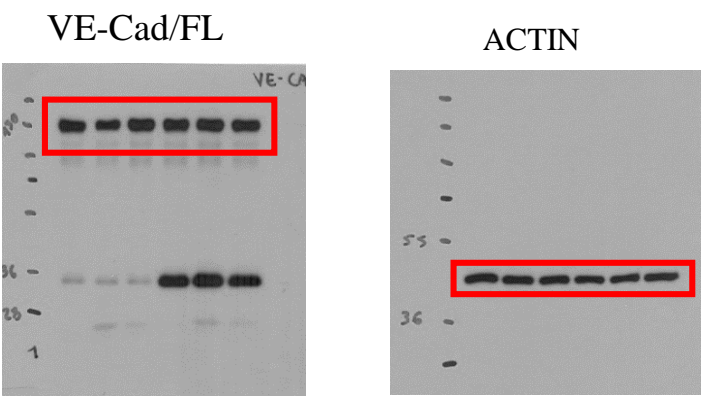

LONGER EXPOSURE USED FOR VE-Cad/CTF1  
AND VE-Cad/CTF2

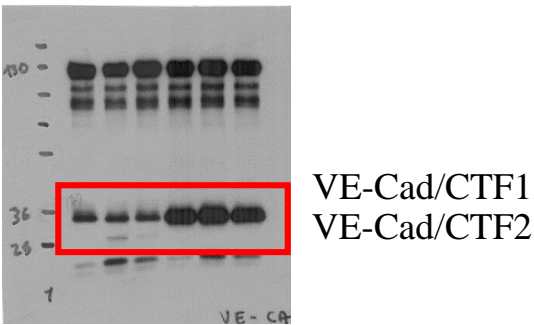

MUCH LONGER EXPOSURE

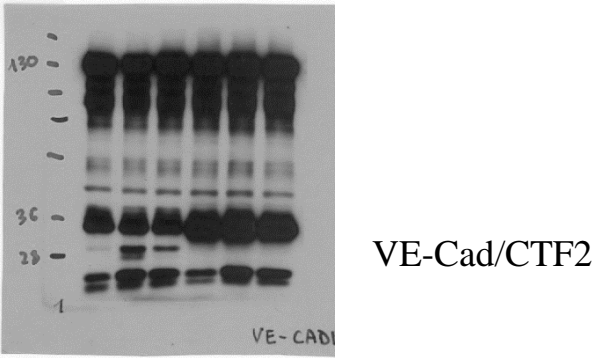

Fig. 2a

SHORTER EXPOSURE USED FOR VE-cadherin FULL LENGTH

VE-Cad/FL

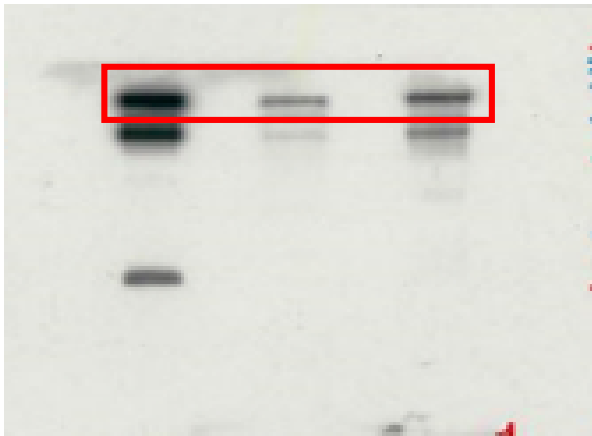

LONGER EXPOSURE USED FOR VE-Cad/CTF1 AND  
VE-Cad/CTF2

VE-Cad/CTF1  
and VE-Cad/CTF2

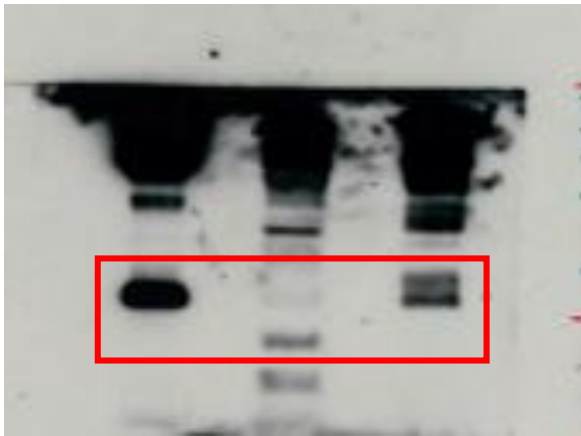

Fig. 2b

SHORTER EXPOSURES USED FOR  
VE-cadherin FULL LENGTH, ACTIN AND P-smad1,5,8

VE-Cad/FL

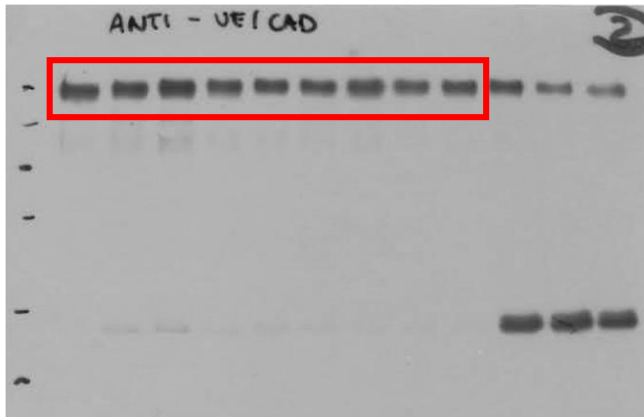

ACTIN

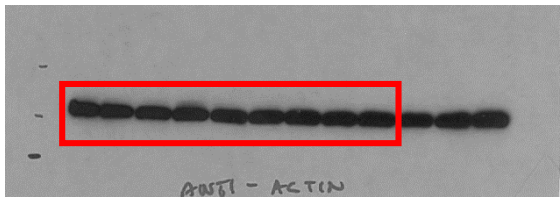

P-smad 1,5,8

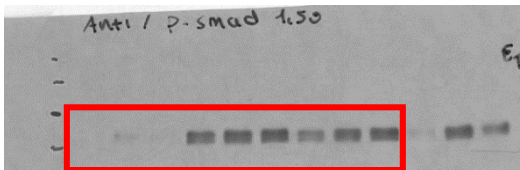

LONGER EXPOSURE USED FOR VE-Cad/CTF1 and VE-Cad/CTF2

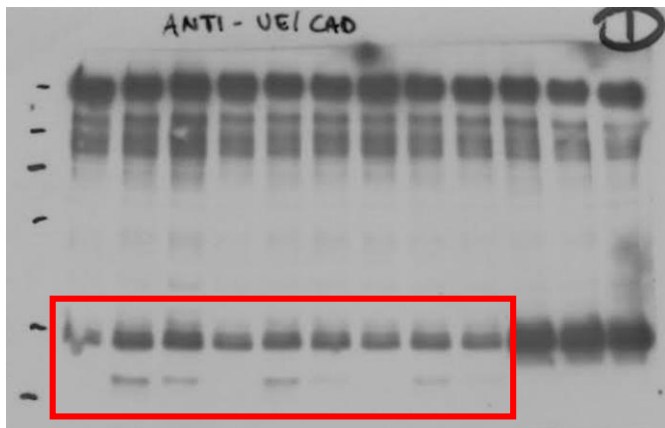

VE-Cad/CTF1  
VE-Cad/CTF2

Fig. 2c



SHORTER EXPOSURE BLOTS USED FOR  
VE-cadherin FULL LENGTH and ACTIN

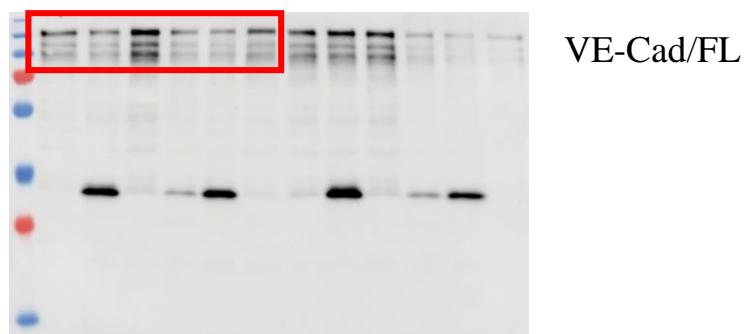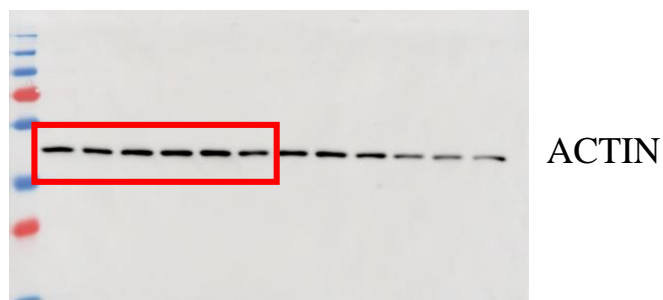

LONGER EXPOSURE BLOT USED FOR  
VE-cadherin CTF1 and CTF2

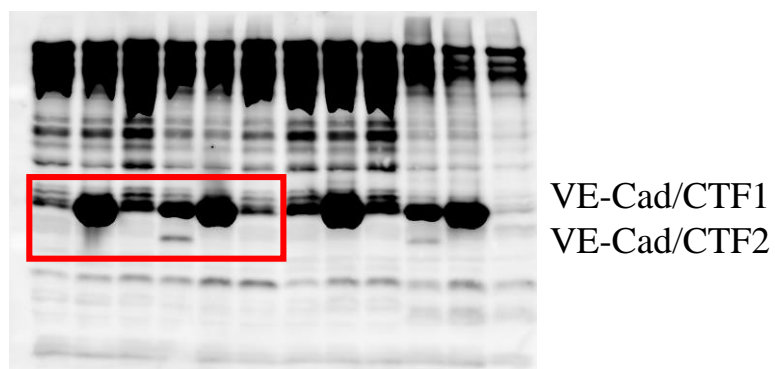

Fig. 3a

SHORTER EXPOSURE BLOTS USED FOR  
VE-cadherin FULL LENGTH, ACTIN AND P-smad1,5,8

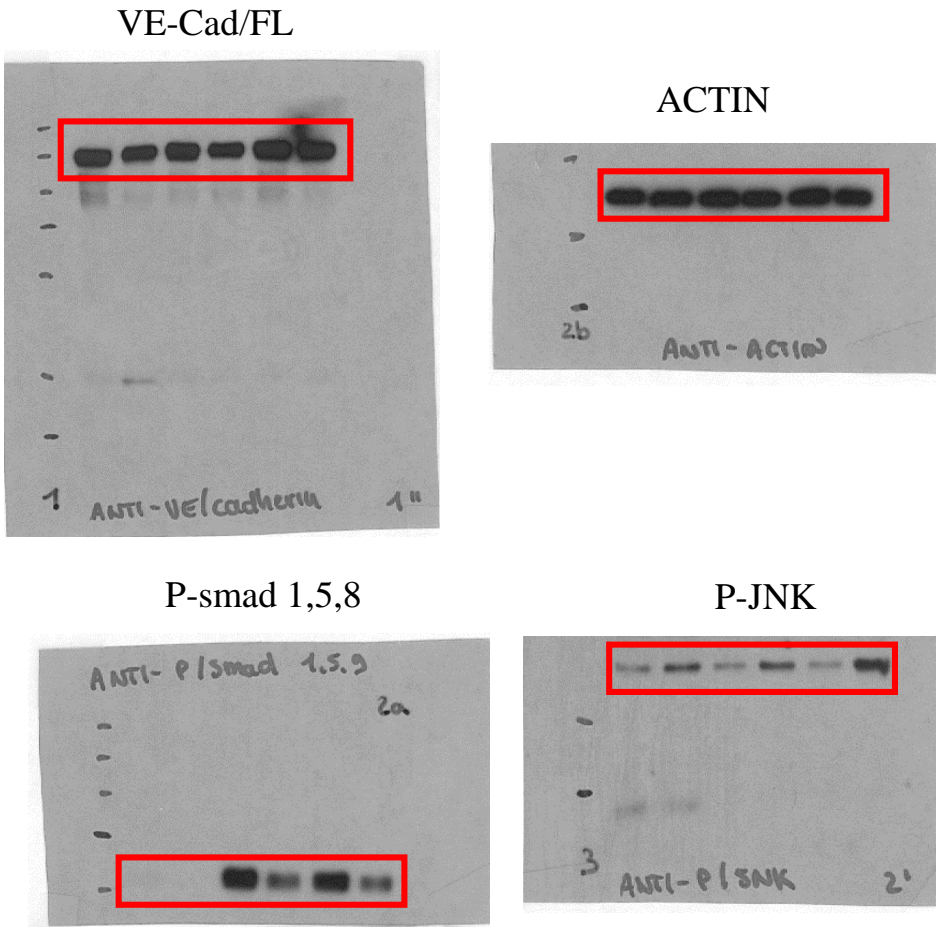

LONGER EXPOSURE USED FOR VE-Cad/CTF1  
and CTF2

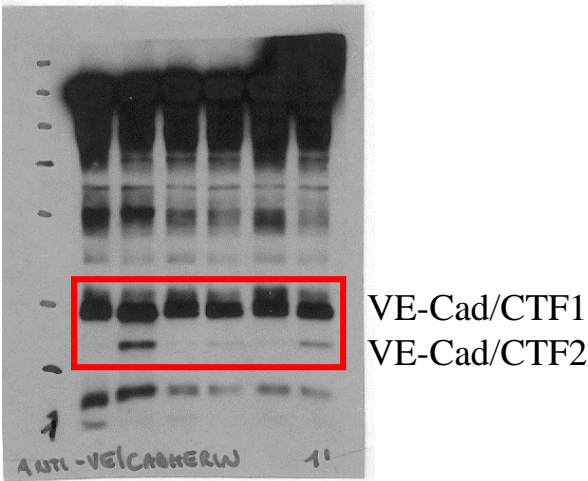

Fig. 3b

SHORTER EXPOSURE BLOTS USED FOR  
VE-cadherin FULL LENGTH and ACTIN

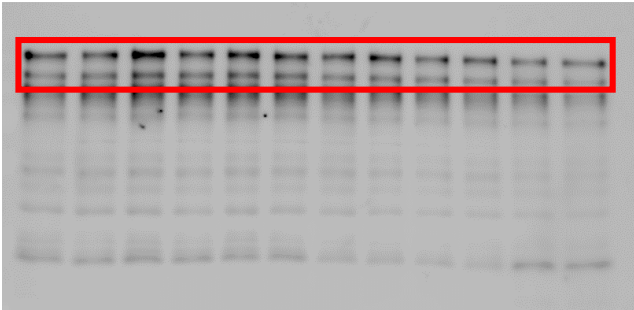

VE-Cad/FL

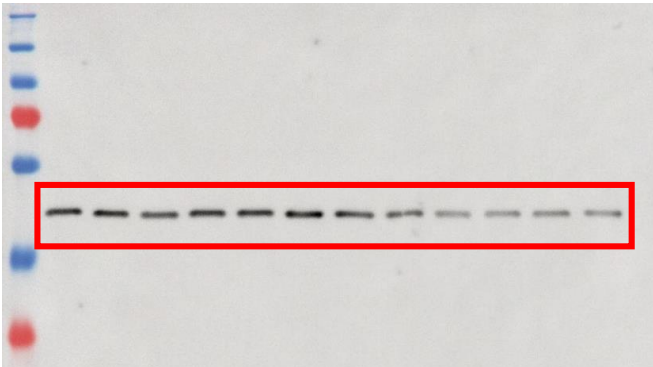

ACTIN

LONGER EXPOSURE USED FOR VE-Cad/CTF1  
and CTF2

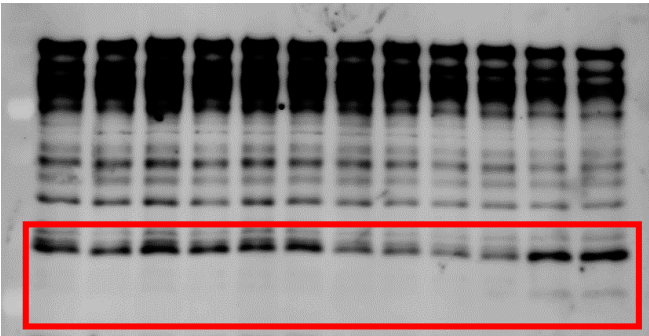

VE-Cad/CTF1  
VE-Cad/CTF2
